# Supplementary material for: Earthquake Contributions to Coastal Cliff Retreat
Source: Copernicus journal article supplement (doi:10.5194/egusphere-2022-643), 2022-08-18
Supplement: Supplementary file [file egusphere-2022-643-AC1-supplement.pdf]

### Hypothetical 300 year Coastal Cliff Retreat at Conway Flat

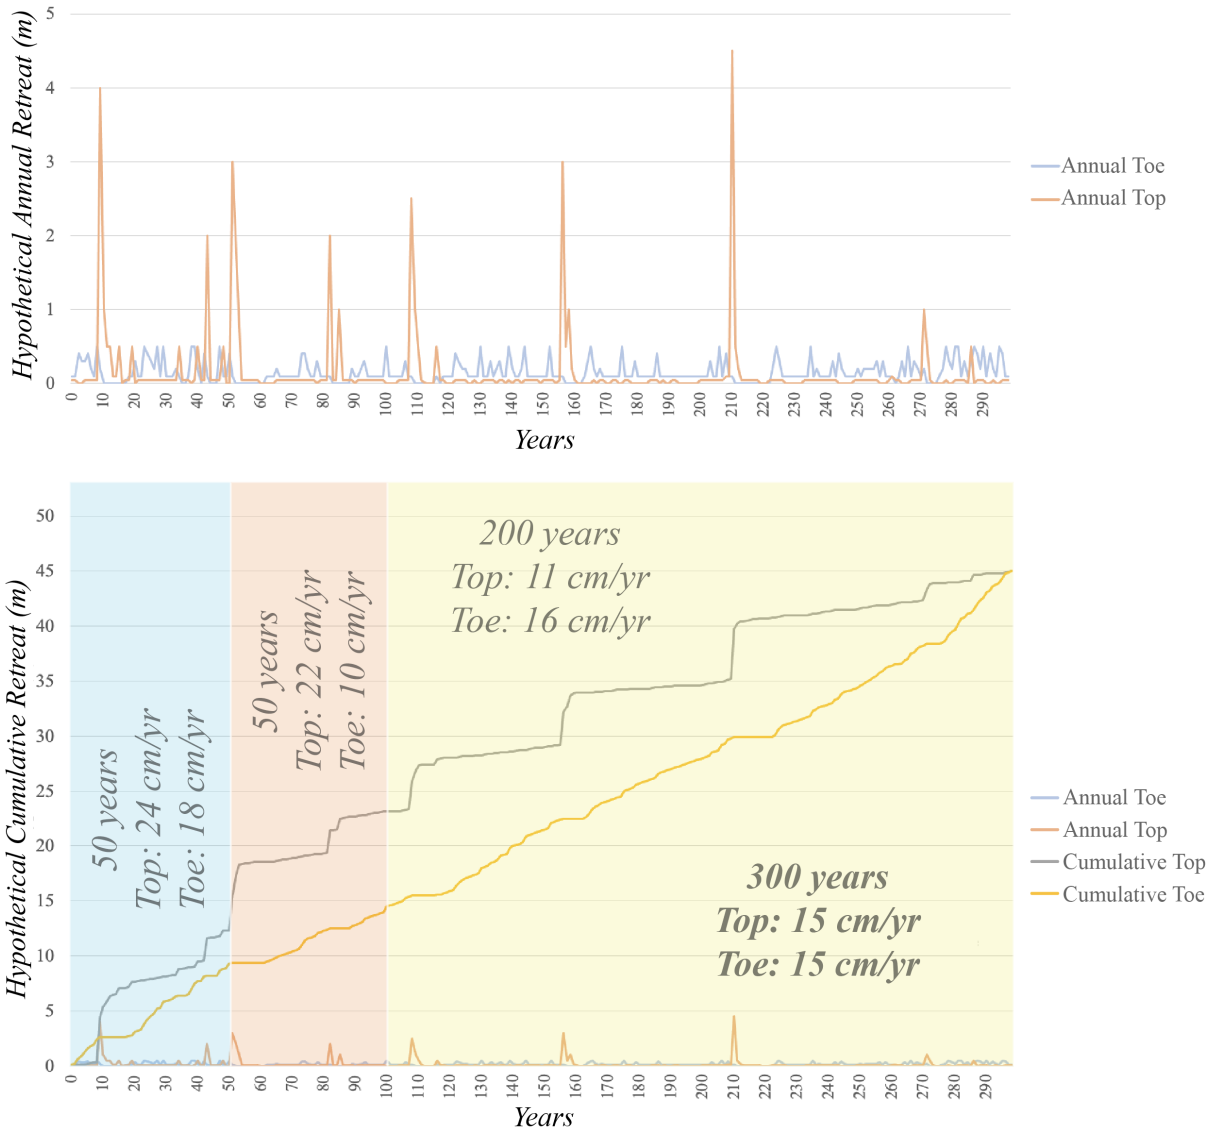

Figure R1. Hypothetical cliff-toe and cliff-top retreat and cumulative retreat at Conway Flat. Over multidecadal timescales, variability in cliff-top and cliff-toe retreat can result in substantially different retreat rates.

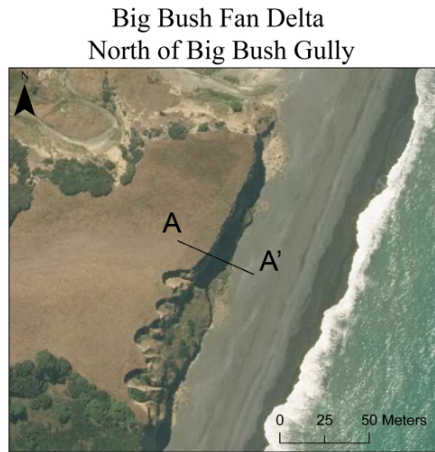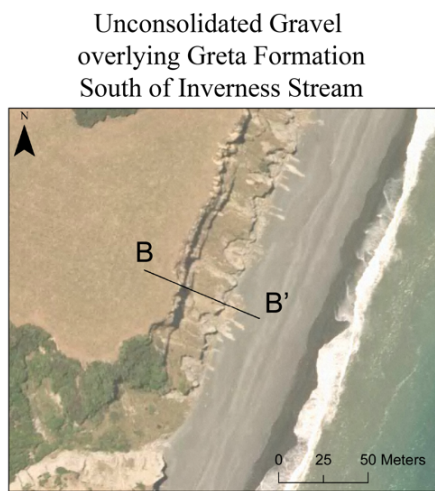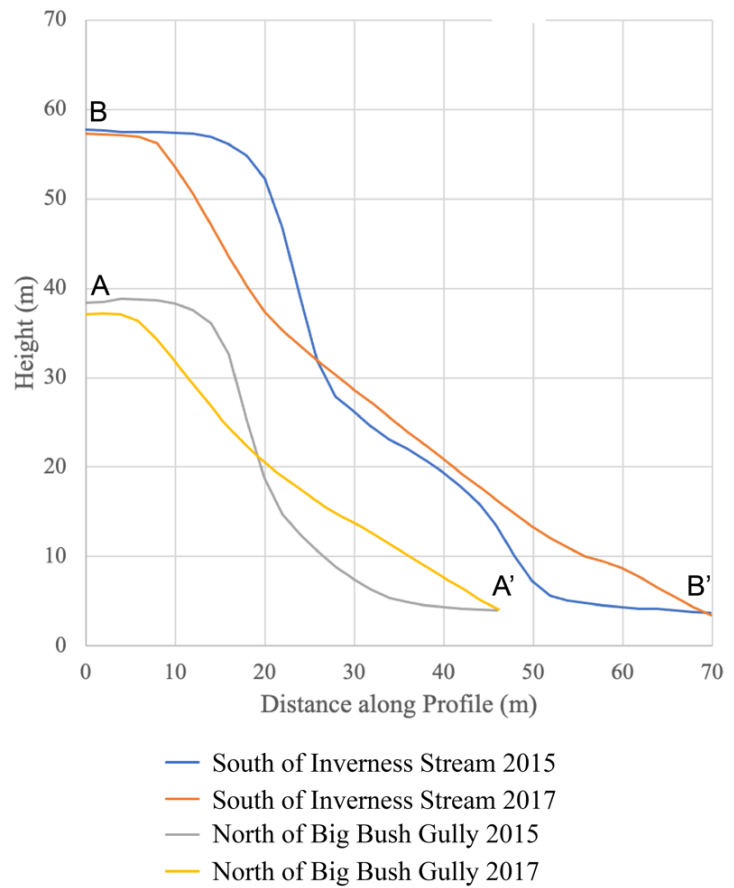

Figure R2. Comparative Cliff Profiles. Profile A is taken from a cliff face that consists entirely of fan delta deposits. Profile B is taken from a cliff face that consists of Greta Formation overlain by unconsolidated gravels. The contact between underlying Greta and overlying unconsolidated sediment occurs at approximately 30 m height in Profile B.
